# Supplementary material
Source: PubMed Central journal article supplement (PMC2757969)

## SUPPLEMENTAL DATA

**Figure S1.** Correlation of  $\text{Ln}K_{\text{eq}}$  with pressure for CYP2B1 WT and the three cys variants.

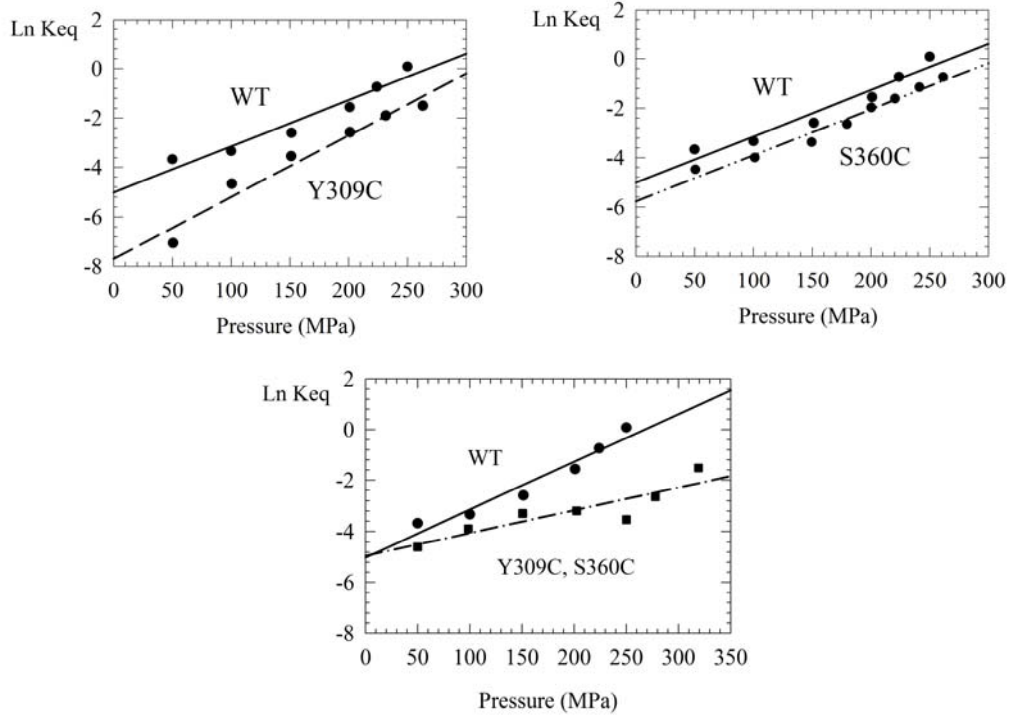

**Figure S2.** Time dependence of the  $C\alpha$  RMSD of CYP2B1 WT (solid line) and the Y309C/S360C variant (dashed line) obtained from a 2 ns MD simulations at 300K. The initial coordinate was used as reference to calculate the RMSD.

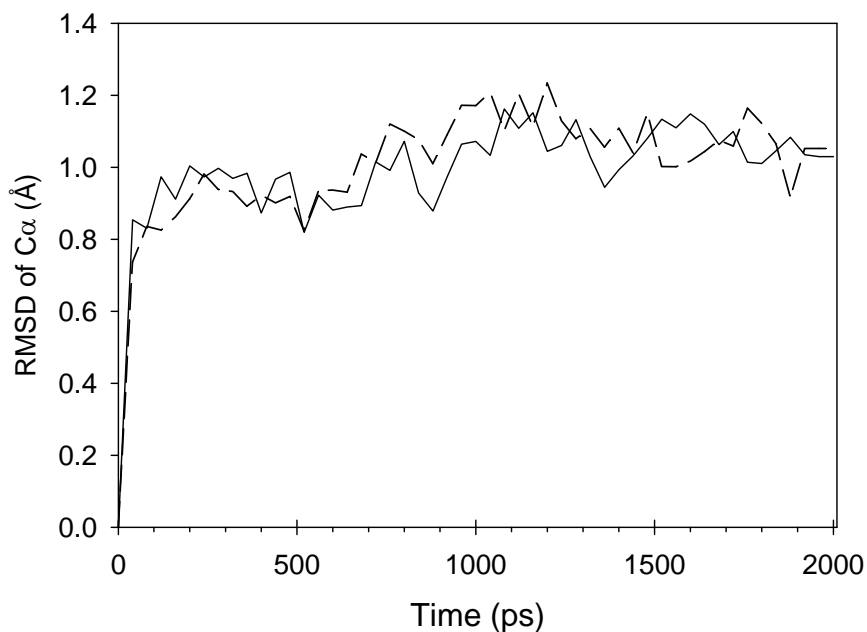

**Figure S3.** RMSD values of CYP2B1 WT and Y309CS360C (YS) obtained from 2 ns MD simulations at 300K. The initial coordinate was used as reference to calculate the RMSD. The horizontal bars represent the plastic regions identified by Zhao et al. (6)

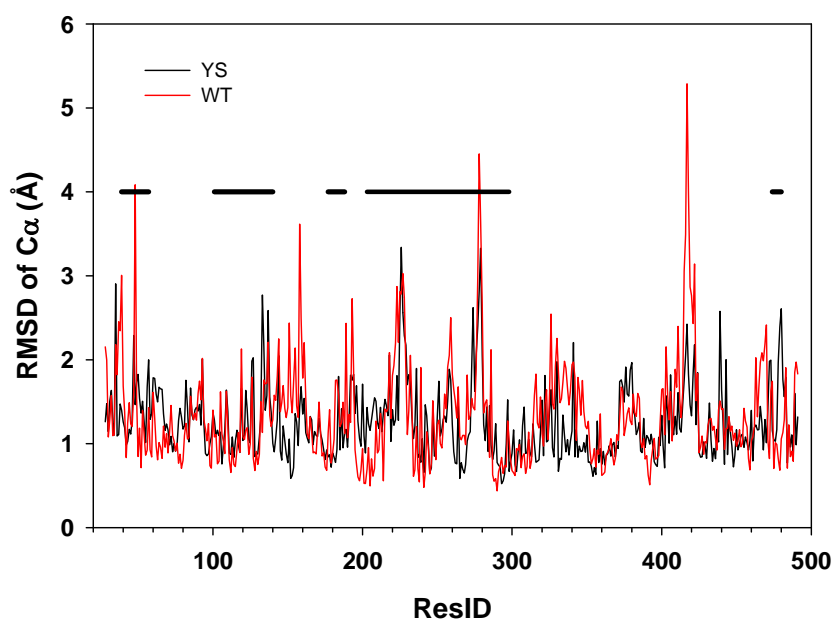

Supplement: supp_M109.032748_jbc.M109.032748-1.pdf [file supp_M109.032748_jbc.M109.032748-1.pdf]
